# Supplementary material for: The Effects of Passive Simulated Jogging on Parameters of Explosive Handgrip in Nondiabetics and Type 2 Diabetics: A Single Arm Study
Source: Hindawi journal article supplement (doi:10.1155/2022/6450844), 2022-01-01
Supplement: f1 [file 6450844.f1.pdf]

## Electronic Supplemental Material File (ESM\_F1)

### The Effects of Passive Simulated Jogging on Parameters of Explosive Handgrip in Non-Diabetics and Type 2 Diabetics: A Single Arm Study

Jose A Adams<sup>1\*</sup>¶, Jose R Lopez<sup>2</sup>¶, Veronica Banderas<sup>3</sup>¶, Marvin A Sackner<sup>4</sup>¶†

1. Chief, Division Neonatology, Mount Sinai Medical Center of Greater Miami, Miami Beach, Florida, United States of America
2. Research Scientist, Mount Sinai Medical Center of Greater Miami, Miami Beach Florida, United States of America
3. Study Coordinator, Sackner Wellness Products LLC. Miami, Florida, United States of America
4. Emeritus Director of Medical Services, Mt Sinai Medical Center of Greater Miami, Miami Beach, Florida, United States of America

\*Corresponding author

Jose A. Adams, M.D

Mount Sinai Medical Center

4300 Alton Road

Miami Beach Fla, USA 33140

Tel: 305-674-2727

Fax: 305-674-2306

E-mail: [Tony@msmc.com](mailto:Tony@msmc.com)

[ORCID](https://orcid.org/0000-0002-9401-2226): <https://orcid.org/0000-0002-9401-2226>

*ClinicalTrials.gov* NCT03550105 (08-06-2018)

December 15, 2021

**Short Title: JD on Handgrip**

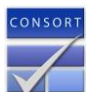

## CONSORT 2010 checklist of information to include when reporting a randomised trial\*

| Section/Topic                    | Item No | Checklist item                                                                                                                                                                              | Reported on page No |
|----------------------------------|---------|---------------------------------------------------------------------------------------------------------------------------------------------------------------------------------------------|---------------------|
| <b>Title and abstract</b>        |         |                                                                                                                                                                                             |                     |
|                                  | 1a      | Identification as a randomised trial in the title                                                                                                                                           | N/A                 |
|                                  | 1b      | Structured summary of trial design, methods, results, and conclusions (for specific guidance see CONSORT for abstracts)                                                                     | 3-4                 |
| <b>Introduction</b>              |         |                                                                                                                                                                                             |                     |
| Background and objectives        | 2a      | Scientific background and explanation of rationale                                                                                                                                          | 5                   |
|                                  | 2b      | Specific objectives or hypotheses                                                                                                                                                           | 6                   |
| <b>Methods</b>                   |         |                                                                                                                                                                                             |                     |
| Trial design                     | 3a      | Description of trial design (such as parallel, factorial) including allocation ratio                                                                                                        | 6-8                 |
|                                  | 3b      | Important changes to methods after trial commencement (such as eligibility criteria), with reasons                                                                                          | 6-8                 |
| Participants                     | 4a      | Eligibility criteria for participants                                                                                                                                                       | 8                   |
|                                  | 4b      | Settings and locations where the data were collected                                                                                                                                        | 6-8                 |
| Interventions                    | 5       | The interventions for each group with sufficient details to allow replication, including how and when they were actually administered                                                       | 8-9                 |
| Outcomes                         | 6a      | Completely defined pre-specified primary and secondary outcome measures, including how and when they were assessed                                                                          | 9-10                |
|                                  | 6b      | Any changes to trial outcomes after the trial commenced, with reasons                                                                                                                       | N/A                 |
| Sample size                      | 7a      | How sample size was determined                                                                                                                                                              | 10                  |
|                                  | 7b      | When applicable, explanation of any interim analyses and stopping guidelines                                                                                                                | N/A                 |
| <b>Randomisation:</b>            |         |                                                                                                                                                                                             |                     |
| Sequence generation              | 8a      | Method used to generate the random allocation sequence                                                                                                                                      | N/A                 |
|                                  | 8b      | Type of randomisation; details of any restriction (such as blocking and block size)                                                                                                         | N/A                 |
| Allocation concealment mechanism | 9       | Mechanism used to implement the random allocation sequence (such as sequentially numbered containers), describing any steps taken to conceal the sequence until interventions were assigned | N/A                 |
| Implementation                   | 10      | Who generated the random allocation sequence, who enrolled participants, and who assigned participants to interventions                                                                     | N/A                 |
| Blinding                         | 11a     | If done, who was blinded after assignment to interventions (for example, participants, care providers, those                                                                                | N/A                 |

|                                                      |     |                                                                                                                                                   |                  |
|------------------------------------------------------|-----|---------------------------------------------------------------------------------------------------------------------------------------------------|------------------|
|                                                      |     | assessing outcomes) and how                                                                                                                       |                  |
|                                                      | 11b | If relevant, description of the similarity of interventions                                                                                       | N/A              |
| Statistical methods                                  | 12a | Statistical methods used to compare groups for primary and secondary outcomes                                                                     | 10               |
|                                                      | 12b | Methods for additional analyses, such as subgroup analyses and adjusted analyses                                                                  | 10               |
| <b>Results</b>                                       |     |                                                                                                                                                   |                  |
| Participant flow (a diagram is strongly recommended) | 13a | For each group, the numbers of participants who were randomly assigned, received intended treatment, and were analysed for the primary outcome    | 8                |
|                                                      | 13b | For each group, losses and exclusions after randomisation, together with reasons                                                                  | 8 & Flow Diagram |
| Recruitment                                          | 14a | Dates defining the periods of recruitment and follow-up                                                                                           | N/A              |
|                                                      | 14b | Why the trial ended or was stopped                                                                                                                | N/A              |
| Baseline data                                        | 15  | A table showing baseline demographic and clinical characteristics for each group                                                                  | Table 1          |
| Numbers analysed                                     | 16  | For each group, number of participants (denominator) included in each analysis and whether the analysis was by original assigned groups           | 8                |
| Outcomes and estimation                              | 17a | For each primary and secondary outcome, results for each group, and the estimated effect size and its precision (such as 95% confidence interval) | 8 and Figure 2   |
|                                                      | 17b | For binary outcomes, presentation of both absolute and relative effect sizes is recommended                                                       | N/A              |
| Ancillary analyses                                   | 18  | Results of any other analyses performed, including subgroup analyses and adjusted analyses, distinguishing pre-specified from exploratory         | 9                |
| Harms                                                | 19  | All important harms or unintended effects in each group (for specific guidance see CONSORT for harms)                                             | N/A              |
| <b>Discussion</b>                                    |     |                                                                                                                                                   |                  |
| Limitations                                          | 20  | Trial limitations, addressing sources of potential bias, imprecision, and, if relevant, multiplicity of analyses                                  | 19               |
| Generalisability                                     | 21  | Generalisability (external validity, applicability) of the trial findings                                                                         | 19               |
| Interpretation                                       | 22  | Interpretation consistent with results, balancing benefits and harms, and considering other relevant evidence                                     | 19               |
| <b>Other information</b>                             |     |                                                                                                                                                   |                  |
| Registration                                         | 23  | Registration number and name of trial registry                                                                                                    | 1 and 4          |
| Protocol                                             | 24  | Where the full trial protocol can be accessed, if available                                                                                       | 1 and 4          |
| Funding                                              | 25  | Sources of funding and other support (such as supply of drugs), role of funders                                                                   | 28               |

\*We strongly recommend reading this statement in conjunction with the CONSORT 2010 Explanation and Elaboration for important clarifications on all the items. If relevant, we also recommend reading CONSORT extensions for cluster randomised trials, non-inferiority and equivalence trials, non-pharmacological treatments, herbal interventions, and pragmatic trials. Additional extensions are forthcoming: for those and for up to date references relevant to this checklist, see [www.consort-statement.org](http://www.consort-statement.org).

# CONSORT DIAGRAM

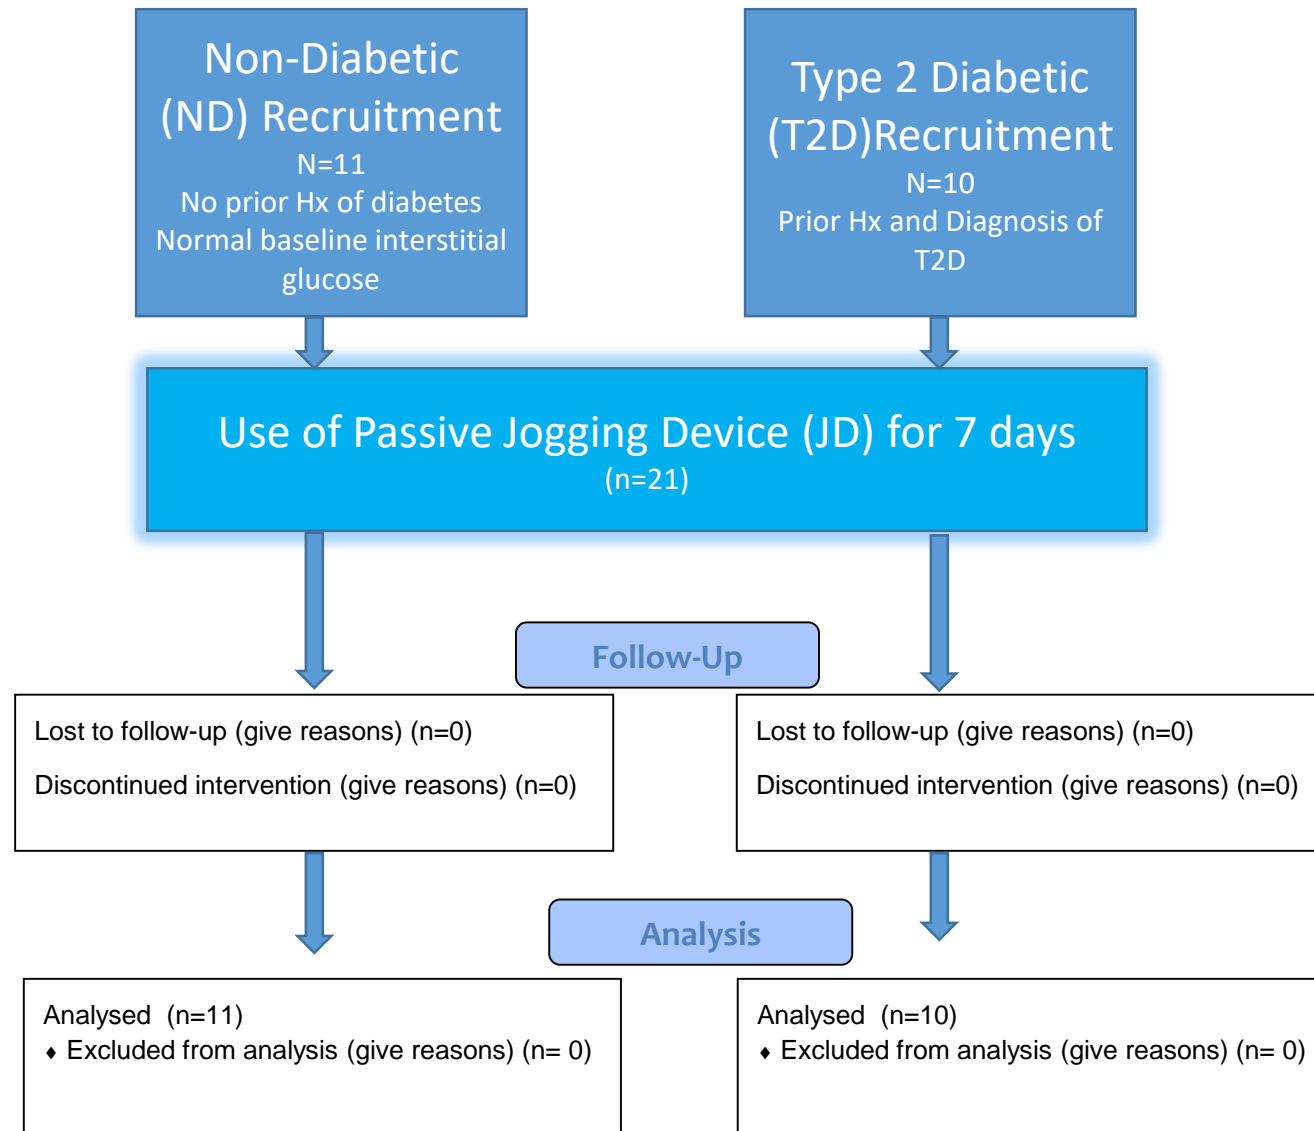

## **Supplementary Table 1**

*Title:* **Study Participants Physical Activity Level (PAL) based on the International Physical Activity Short Form Questionnaire (IPAQ)**

|                      | No              | Gender       | Age<br>Range*   | BMI              | MET-<br>min/week<br>VPA | MET-<br>min/week<br>MPA | MET-<br>min/week<br>walking | MET-<br>min/week<br>total | PAL          | Minutes/<br>week<br>sitting<br>time |
|----------------------|-----------------|--------------|-----------------|------------------|-------------------------|-------------------------|-----------------------------|---------------------------|--------------|-------------------------------------|
| <b>Non-Diabetics</b> |                 |              |                 |                  |                         |                         |                             |                           |              |                                     |
|                      | 1               | M            | 40-45           | 42.6             | N/A                     | N/A                     | N/A                         | N/A                       | N/A          | N/A                                 |
|                      | 2               | M            | 60-65           | 28.9             | N/A                     | N/A                     | N/A                         | N/A                       | N/A          | N/A                                 |
|                      | 3               | M            | 30-35           | 27.5             | N/A                     | N/A                     | N/A                         | N/A                       | N/A          | N/A                                 |
|                      | 4               | F            | 50-55           | 31.8             | N/A                     | N/A                     | N/A                         | N/A                       | N/A          | N/A                                 |
|                      | 5               | F            | 30-35           | 18.5             | 1280                    | 720                     | 4158                        | 6158                      | HIGH         | 240                                 |
|                      | 6               | F            | 25-30           | 22.9             | 960                     | 840                     | 4158                        | 5958                      | HIGH         | 240                                 |
|                      | 7               | M            | 30-35           | 20.3             | 960                     | 720                     | 1386                        | 3066                      | HIGH         | 240                                 |
|                      | 8               | F            | 25-30           | 28.2             | 1400                    | 480                     | 2772                        | 4652                      | HIGH         | 240                                 |
|                      | 9               | F            | 40-45           | 25.41            | 720                     | 360                     | 990                         | 2070                      | HIGH         | 420                                 |
|                      | 10              | F            | 25-30           | 29.2             | 720                     | 360                     | 1980                        | 3060                      | HIGH         | 420                                 |
|                      | 11              | M            | 30-35           | 20.3             | 2400                    | 240                     | 1980                        | 4620                      | HIGH         | 240                                 |
|                      | <b>MEAN(SD)</b> | <b>6F 5M</b> | <b>37(11.7)</b> | <b>26.9(6.8)</b> | <b>1206(586)</b>        | <b>531(228)</b>         | <b>2489(1267)</b>           | <b>4226(1550)</b>         |              | <b>291(88)</b>                      |
| <b>Diabetics</b>     |                 |              |                 |                  |                         |                         |                             |                           |              |                                     |
|                      | 1               | F            | 70-75           | 27.8             | 0                       | 0                       | 330                         | 330                       | LOW          | 420                                 |
|                      | 2               | F            | 50-55           | 28.8             | 0                       | 160                     | 330                         | 490                       | LOW          | 300                                 |
|                      | 3               | M            | 40-45           | 24.8             | 0                       | 0                       | 396                         | 396                       | LOW          | 480                                 |
|                      | 4               | M            | 65-70           | 24               | 0                       | 0                       | 297                         | 297                       | LOW          | 600                                 |
|                      | 5               | F            | 55-60           | 29.3             | 0                       | 0                       | 264                         | 264                       | LOW          | 420                                 |
|                      | 6               | F            | 60-65           | 44.8             | 0                       | 0                       | 66                          | 66                        | LOW          | 360                                 |
|                      | 7               | F            | 50-55           | 29.7             | 0                       | 0                       | 495                         | 495                       | MODE<br>RATE | 360                                 |

|  |                 |              |                   |                  |            |               |                 |                 |     |                |
|--|-----------------|--------------|-------------------|------------------|------------|---------------|-----------------|-----------------|-----|----------------|
|  | 8               | F            | 75-80             | 29               | 0          | 0             | 148.5           | 148.5           | LOW | 420            |
|  | 9               | M            | 60-65             | 29.7             | 0          | 0             | 396             | 396             | LOW | 480            |
|  | 10              | F            | 40-45             | 26.2             | 0          | 0             | 462             | 462             | LOW | 360            |
|  | <b>MEAN(SD)</b> | <b>7F 3M</b> | <b>58.9(10.7)</b> | <b>29.4(5.5)</b> | <b>0.0</b> | <b>16(51)</b> | <b>318(133)</b> | <b>334(144)</b> |     | <b>420(85)</b> |

*Legend: This table represent the study participants' physical activity level (PAL) based on the categorical groups outlined in IPAQ. The study subject number (No), gender, age(years), Calculated Body Mass Index (BMI). Time variables for minutes per week converted to MET (Metabolic Equivalent) for vigorous (MET-min/week VPA), Moderate (MET-min/week MPA), walking (MET-min/week walking), sum of the aforementioned (MET-min/week total) and minutes per week of sitting time. Mean and standard deviation (SD) for each column. N/A refers to data not available. \*Age Range is used in order to protect any participant identifiable information. The scoring protocol for IPAQ utilized the file created by Andrea Di Blasio, Francesco Di Donato and Christian Mazzocco at the Endocrinology Unit, Department of Medicine and Aging Sciences, G. d'Annunzio University of Chieti-Pescara (Italy), which can be found <https://sites.google.com/site/theipaq/scoring-protocol>*

## **Supplementary Table 2**

**Common Language Effect Size (CLES) of Jogging Device (JD) on Type 2 Diabetics (T2D) and Non-diabetics (ND) after 7 days of JD (JD7) and 3 days after discontinuation of JD(Carryover) on statistically significant parameters of the Handgrip Test.**

| Parameter                       | JD7 |     | Carryover |     |
|---------------------------------|-----|-----|-----------|-----|
|                                 | T2D | ND  | T2D       | ND  |
| <b>Fatigue Resistance (sec)</b> |     |     |           |     |
| FR <sub>25</sub>                | 74% | 78% | 91%       | 74% |
| FR <sub>TF</sub>                |     | 77% | 84%       |     |
| <b>AUC(N/sec)</b>               |     |     |           |     |
| iAUC <sub>TF</sub>              | 72% | 81% | 76%       | 83% |

*Legend: Analysis of effect size of the Jogging Device (JD) for T2D and ND on significant variables of the Explosive Hand Grip test using the Non Parametric Common Language Effect Size (CLES). Fatigue resistance (sec) defined as the time at which grip strength decreases to, 25% of maximal force and task failure (FR<sub>25</sub>, FR<sub>TF</sub>). Integrated area under the curve for force vs. time for the entire curve until task failure (iAUC<sub>TF</sub>), after 7 days of JD (JD7) and 3 days after discontinuation of JD (Carryover). The value represents the probability that a value chosen randomly from the intervention group (JD) will differ from a value chosen randomly from the control group (Bl).*

**FIG 1 S**

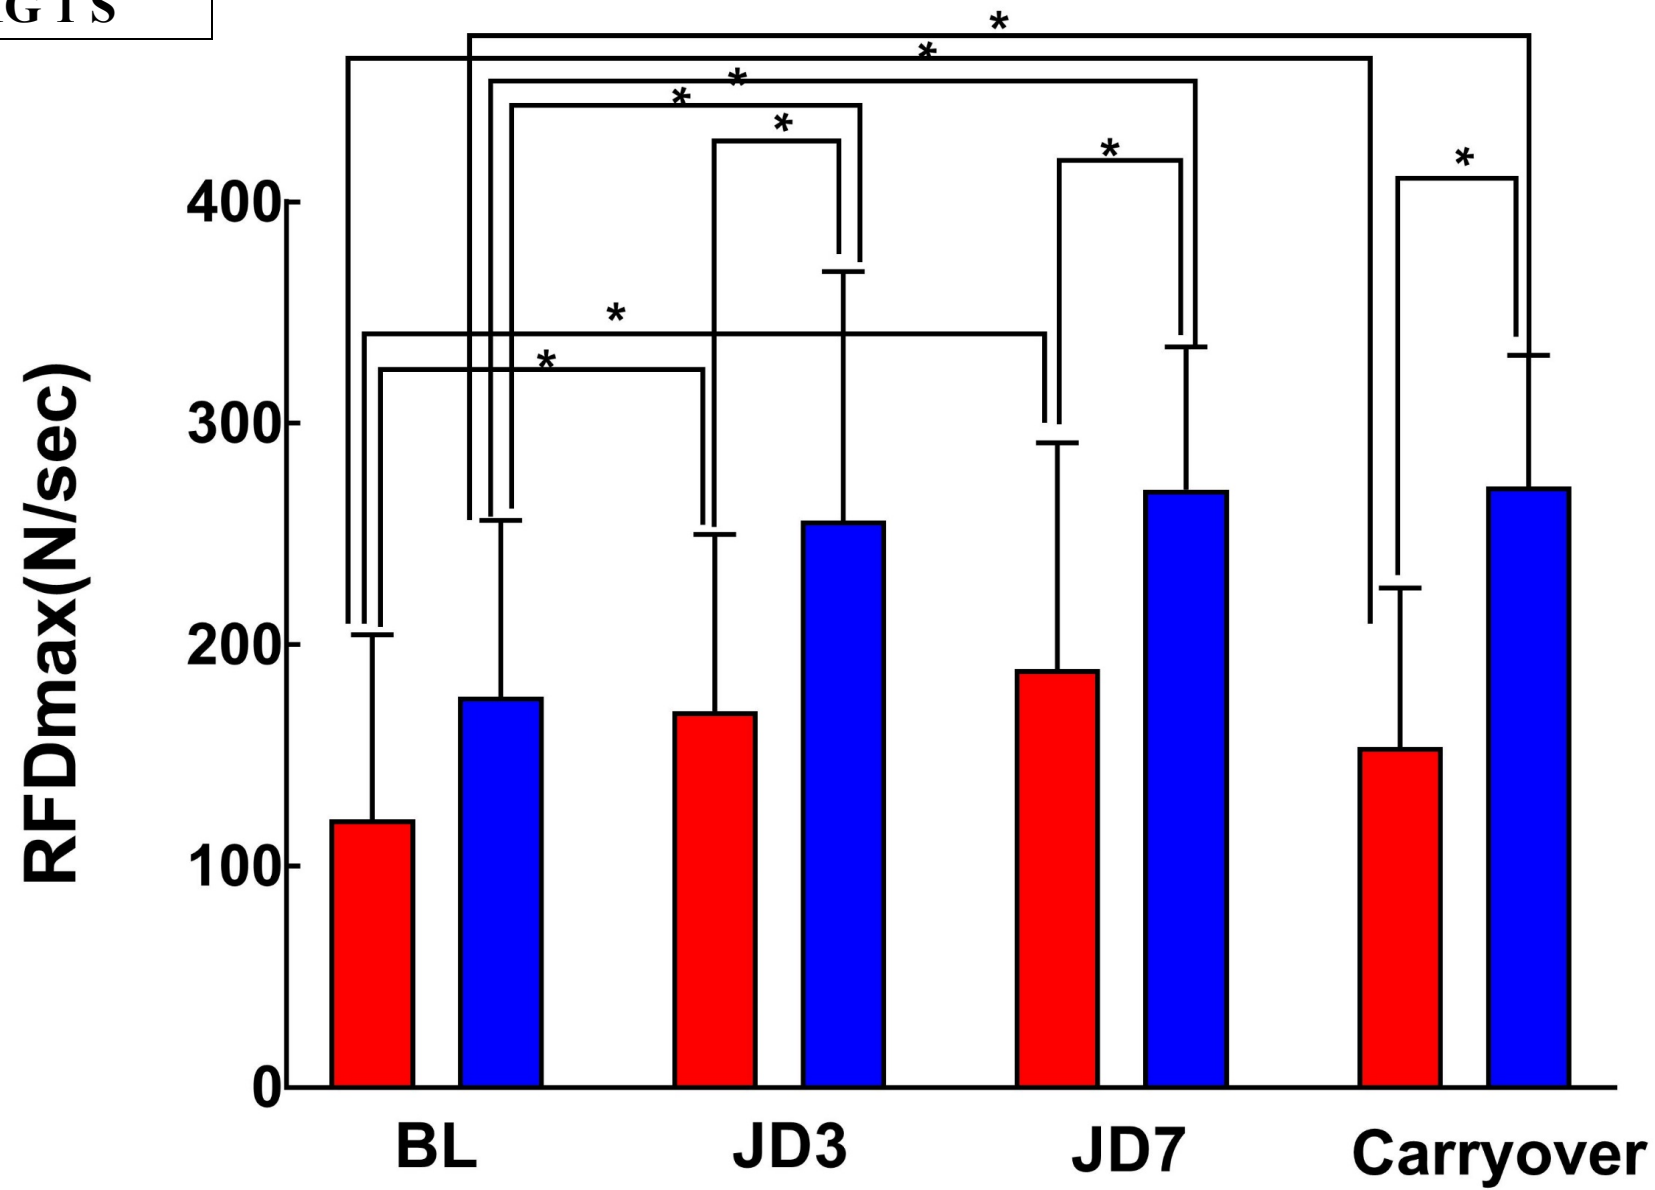

***Title:*** The effects of Jogging Device (JD) on maximal rate of force development ( $RFD_{max}$ ) in type 2 diabetes (T2D –Red) and non-diabetics (ND-blue).

*Legend* The effects of Jogging Device (JD) on maximal rate of force development ( $RFD_{max}$ ) in type 2 diabetes (T2D –Red) and non-diabetics (ND-blue). There was no difference between T2D and ND at baseline (BL). JD increased  $RFD_{max}$  in both T2D and ND.  $RFD_{max}$  was larger in ND compared to T2D after 3, 7 days of JD and Carryover. \*  $p < 0.05$

# Analysis of Covariance

## Tests of Between-Subjects Effects

Dependent Variable: RFD<sub>MAX</sub>

| Source             | Type III Sum of Squares | df | Mean Square | F      | Sig.  | Partial Eta Squared |
|--------------------|-------------------------|----|-------------|--------|-------|---------------------|
| Corrected Model    | 237717.973 <sup>a</sup> | 8  | 29714.747   | 4.253  | 0     | 0.324               |
| Intercept          | 159391.297              | 1  | 159391.297  | 22.811 | 0     | 0.243               |
| AGE                | 4.228                   | 1  | 4.228       | 0.001  | 0.98  | 0                   |
| Day(BL, JD)        | 77268.665               | 3  | 25756.222   | 3.686  | 0.016 | 0.135               |
| T2D-ND             | 69894.722               | 1  | 69894.722   | 10.003 | 0.002 | 0.123               |
| Day * Day (BL, JD) | 9546.48                 | 3  | 3182.16     | 0.455  | 0.714 | 0.019               |
| Error              | 496109.374              | 71 | 6987.456    |        |       |                     |
| Total              | 4079136.514             | 80 |             |        |       |                     |
| Corrected Total    | 733827.347              | 79 |             |        |       |                     |

<sup>a</sup> R Squared = .324 (Adjusted R Squared = .248)

## Tests of Between-Subjects Effects

Dependent Variable: RFD<sub>MAX</sub>

| Source                        | Type III Sum of Squares | df | Mean Square | F      | Sig.  | Partial Eta Squared |
|-------------------------------|-------------------------|----|-------------|--------|-------|---------------------|
| Corrected Model               | 392585.904 <sup>a</sup> | 16 | 24536.619   | 4.53   | 0     | 0.535               |
| Intercept                     | 178877.983              | 1  | 178877.983  | 33.024 | 0     | 0.344               |
| AGE                           | 181.212                 | 1  | 181.212     | 0.033  | 0.855 | 0.001               |
| Day(BL, JD)                   | 61605.565               | 3  | 20535.188   | 3.791  | 0.015 | 0.153               |
| T2D-ND                        | 39896.476               | 1  | 39896.476   | 7.366  | 0.009 | 0.105               |
| GENDER                        | 103232.496              | 1  | 103232.496  | 19.059 | 0     | 0.232               |
| Day(BL, JD) * T2D-ND          | 9904.847                | 3  | 3301.616    | 0.61   | 0.611 | 0.028               |
| Day(BL, JD) * GENDER          | 14038.479               | 3  | 4679.493    | 0.864  | 0.465 | 0.04                |
| T2D-ND * GENDER               | 8524.338                | 1  | 8524.338    | 1.574  | 0.214 | 0.024               |
| Day(BL, JD) * T2D-ND * GENDER | 26104.39                | 3  | 8701.463    | 1.606  | 0.197 | 0.071               |
| Error                         | 341241.443              | 63 | 5416.531    |        |       |                     |
| Total                         | 4079136.514             | 80 |             |        |       |                     |
| Corrected Total               | 733827.347              | 79 |             |        |       |                     |

<sup>a</sup> R Squared = .535 (Adjusted R Squared = .417)

**Tests of Between-Subjects Effects****Dependent Variable: MAX(N )**

| <b>Source</b>   | <b>Type III Sum of Squares</b> | <b>df</b> | <b>Mean Square</b> | <b>F</b> | <b>Sig.</b> | <b>Partial Eta Squared</b> |
|-----------------|--------------------------------|-----------|--------------------|----------|-------------|----------------------------|
| Corrected Model | 844140.134 <sup>a</sup>        | 3         | 281380.045         | 25.659   | 0           | 0.503                      |
| Intercept       | 11567714.24                    | 1         | 11567714.24        | 1054.859 | 0           | 0.933                      |
| T2D-ND          | 107609.662                     | 1         | 107609.662         | 9.813    | 0.002       | 0.114                      |
| GENDER          | 606559.017                     | 1         | 606559.017         | 55.312   | 0           | 0.421                      |
| T2D-ND * GENDER | 3351.844                       | 1         | 3351.844           | 0.306    | 0.582       | 0.004                      |
| Error           | 833425.27                      | 76        | 10966.122          |          |             |                            |
| Total           | 13442961.91                    | 80        |                    |          |             |                            |
| Corrected Total | 1677565.404                    | 79        |                    |          |             |                            |

<sup>a</sup> R Squared = .503 (Adjusted R Squared = .484)**Tests of Between-Subjects Effects****Dependent Variable: MAX(N )**

| <b>Source</b>        | <b>Type III Sum of Squares</b> | <b>df</b> | <b>Mean Square</b> | <b>F</b> | <b>Sig.</b> | <b>Partial Eta Squared</b> |
|----------------------|--------------------------------|-----------|--------------------|----------|-------------|----------------------------|
| Corrected Model      | 327842.969 <sup>a</sup>        | 8         | 40980.371          | 2.156    | 0.041       | 0.195                      |
| Intercept            | 313238.125                     | 1         | 313238.125         | 16.477   | 0           | 0.188                      |
| AGE                  | 38246.058                      | 1         | 38246.058          | 2.012    | 0.16        | 0.028                      |
| Day(BL, JD)          | 55934.815                      | 3         | 18644.938          | 0.981    | 0.407       | 0.04                       |
| T2D-ND               | 219137.336                     | 1         | 219137.336         | 11.527   | 0.001       | 0.14                       |
| Day(BL, JD) * T2D-ND | 2806.284                       | 3         | 935.428            | 0.049    | 0.985       | 0.002                      |
| Error                | 1349722.435                    | 71        | 19010.175          |          |             |                            |
| Total                | 13442961.91                    | 80        |                    |          |             |                            |
| Corrected Total      | 1677565.404                    | 79        |                    |          |             |                            |

<sup>a</sup> R Squared = .195 (Adjusted R Squared = .105)

**Tests of Between-Subjects****Effects****Dependent Variable: MAX(N)**

| <b>Source</b>                | <b>Type III Sum of Squares</b> | <b>df</b> | <b>Mean Square</b> | <b>F</b> | <b>Sig.</b> | <b>Partial Eta Squared</b> |
|------------------------------|--------------------------------|-----------|--------------------|----------|-------------|----------------------------|
| Corrected Model              | 951664.572 <sup>a</sup>        | 16        | 59479.036          | 5.162    | 0           | 0.567                      |
| Intercept                    | 419418.016                     | 1         | 419418.016         | 36.401   | 0           | 0.366                      |
| AGE                          | 18728.609                      | 1         | 18728.609          | 1.625    | 0.207       | 0.025                      |
| Day(BL, JD)                  | 55513.251                      | 3         | 18504.417          | 1.606    | 0.197       | 0.071                      |
| T2D-ND                       | 102754.29                      | 1         | 102754.29          | 8.918    | 0.004       | 0.124                      |
| GENDER                       | 593189.132                     | 1         | 593189.132         | 51.482   | 0           | 0.45                       |
| Day(BL, JD)*T2D-ND           | 8206.747                       | 3         | 2735.582           | 0.237    | 0.87        | 0.011                      |
| Day(BL, JD)* GENDER          | 943.808                        | 3         | 314.603            | 0.027    | 0.994       | 0.001                      |
| T2D-ND * GENDER              | 6379.979                       | 1         | 6379.979           | 0.554    | 0.46        | 0.009                      |
| Day(BL, JD) *T2D-ND * GENDER | 26967.87                       | 3         | 8989.29            | 0.78     | 0.509       | 0.036                      |
| Error                        | 725900.833                     | 63        | 11522.235          |          |             |                            |
| Total                        | 13442961.91                    | 80        |                    |          |             |                            |
| Corrected Total              | 1677565.404                    | 79        |                    |          |             |                            |

<sup>a</sup> R Squared = .567 (Adjusted R Squared = .457)
